# Supplementary material for: Clinical Outcomes of Second-Line Chemotherapy after Progression on Nab-Paclitaxel Plus Gemcitabine in Patients with Metastatic Pancreatic Adenocarcinoma
Source: PubMed Central journal article supplement — Cancer Res Treat. 2019 Jul 9;52(1):254–62. doi: 10.4143/crt.2019.190 (PMC6962478; doi:10.4143/crt.2019.190), 2019-07-09
Supplement: crt-2019-190-suppl3.pdf [file crt-2019-190-suppl3.pdf]

**S3 Table.** Baseline patients' characteristics according to the second-line chemotherapy

|                                    | Fluoropyrimidine-oxaliplatin doublets<br>(n=78) | Fluoropyrimidine monotherapy<br>(n=37) | p-value |
|------------------------------------|-------------------------------------------------|----------------------------------------|---------|
| <b>Sex</b>                         |                                                 |                                        | 0.51    |
| Male                               | 44 (56.4)                                       | 24 (64.9)                              |         |
| Female                             | 34 (43.6)                                       | 13 (35.1)                              |         |
| <b>Age, median (range, yr)</b>     | 61.0 (35-79)                                    | 60.0 (44-73)                           | 0.44    |
| <b>ECOG performance status</b>     |                                                 |                                        | 0.34    |
| 0                                  | 32 (41.0)                                       | 11 (29.7)                              |         |
| 1-2                                | 46 (59.0)                                       | 26 (70.3)                              |         |
| <b>CA19-9</b>                      |                                                 |                                        | < 0.01  |
| Normal                             | 8 (10.3)                                        | 9 (24.3)                               |         |
| Elevated                           | 35 (44.9)                                       | 27 (73.0)                              |         |
| Not evaluated                      | 35 (44.9)                                       | 1 ( 2.7)                               |         |
| <b>Albumin, median (IQR, g/dL)</b> | 3.5 (3.0-3.7)                                   | 3.5 (3.1-3.9)                          | 0.23    |
| <b>NLR, median (IQR)</b>           | 2.2 (1.6-3.1)                                   | 2.1 (1.3-3.6)                          | 0.53    |
| <b>PLR, median (IQR)</b>           | 155.2 (104.7-224.9)                             | 151.1 (112.1-203.5)                    | 0.72    |
| <b>No. of metastatic sites</b>     |                                                 |                                        | 0.07    |
| 0-1                                | 35 (44.9)                                       | 24 (64.9)                              |         |
| ≥ 2                                | 43 (55.1)                                       | 13 (35.1)                              |         |
| <b>Site(s) of metastases</b>       |                                                 |                                        |         |
| Liver                              | 50 (64.1)                                       | 19 (51.4)                              | 0.27    |
| Lung                               | 19 (24.4)                                       | 10 (27.0)                              | 0.94    |
| Bone                               | 2 (2.6)                                         | 5 (13.5)                               | 0.06    |
| Peritoneum                         | 33 (42.3)                                       | 11 (29.7)                              | 0.28    |
| Lymph node                         | 29 (37.2)                                       | 11 (29.7)                              | 0.57    |
| <b>1L-TTP, median (95% CI, mo)</b> | 5.75 (4.83-6.68)                                | 7.33 (6.08-8.59)                       | 0.08    |

Values are presented as number (%) unless otherwise indicated. ECOG, Eastern Cooperative Oncology Group; CA19-9, carbohydrate antigen 19-9; IQR, interquartile range; NLR, neutrophil-lymphocyte ratio; PLR, platelet-lymphocyte ratio; 1L, first line; TTP, time to progression; CI, confidence interval.
